# Supplementary material for: A Novel Prophage-like Insertion Element within yabG Triggers Early Entry into Sporulation in Clostridium botulinum
Source: MDPI journal article supplement (doi:10.3390/v15122431), 2023-12-14
Supplement: s1 [file s1]

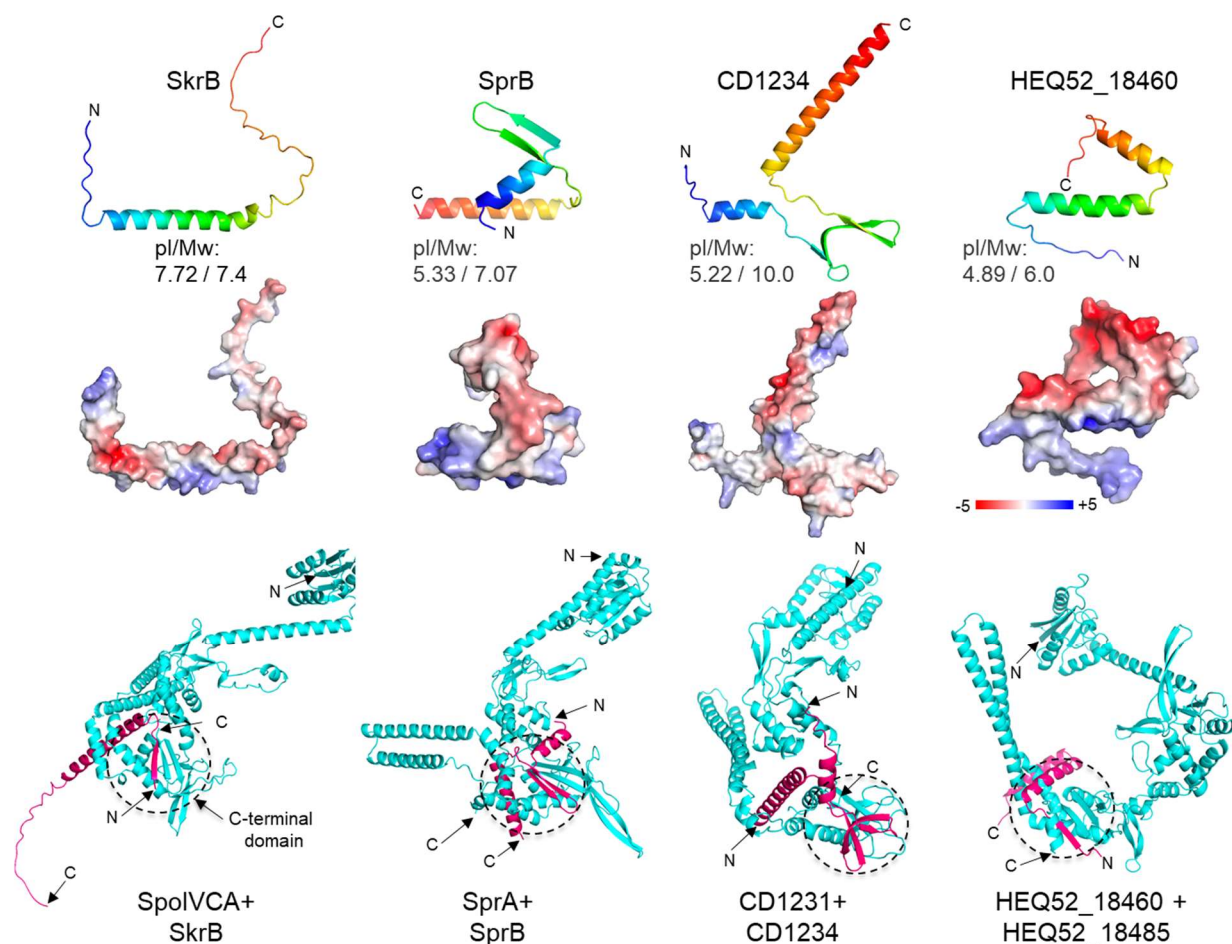

**Figure S1.** AlphaFold protein structure prediction and models of the complexes between the recombinase and its associated recombination directionality factor (RDF). The figure shows structural models generated by AlphaFold2 of the directionality factors SkrB, SprB, CD1234 and the putative *C. botulinum* factor HEQ52\_18460 in cartoon representation colored from the N- (blue) to the C-terminus (red) (top row). The middle row shows the surface potential of the proteins. The bottom row shows the predicted complexes formed by the indicated recombinases (cyan) and their cognate recombination directionality factors (RDFs; dark pink), including the complex between the HEQ52\_18485 recombinase and the putative factor HEQ52\_18460. The C-terminal domain of the recombinases is indicated by a dashed circle. The N- and C-termini of the various proteins are indicated. Note that although the RDFs vary in size, structural elements and surface potential, they all interact with the C-terminal domain of the recombinases. Only the best (rank 1) AlphaFold2-generated models are shown.

```

-118 AAATAAAATGTAAACAGATGTAGTAGCTATTCAGTATATACAATGGA
      σK promoter: -35                                -10
-83  TAACACAAAGGGACA TTTTAACAATTAGAATCATATCTTTAATAAAG
      ACA                                CATAT TT
      RBS                                Start
-27  ATAACAATTTTTTAA GGAGGGATGGGGCATGGTT

```

**Figure S2.** Identification of a putative SigK-dependent promoter upstream of the gene coding for the putative recombination directionality factor (RDF) HEQ52\_18460 in *C. botulinum* V73.

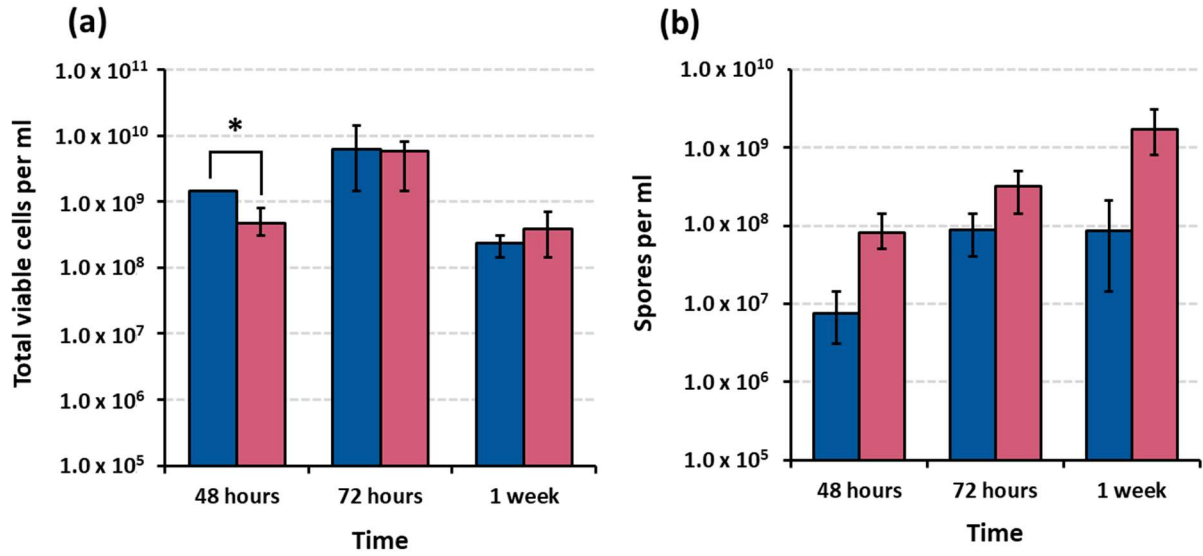

**Figure S3.** Viable cell and spore count of *C. botulinum* ST7B (blue) and V73 (pink) after 48 hours, 72 hours and 1 week based on MPN approach. Spore count was determined after heat treatment, as described in the Materials and Methods section. The experiment was performed in triplicates. Legend: \*  $p$ -value < 0.05 with the t-test.

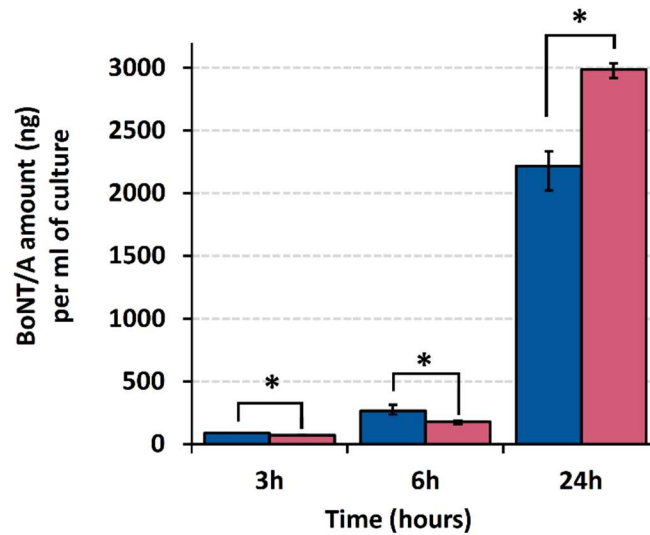

**Figure S4.** BoNT production of *C. botulinum* ST7B (blue) and V73 (pink) in TPGY medium. Error bars represent the minimum and maximum values among replicates. The experiment was performed in triplicate. Legend: \*  $p$ -value < 0.05 with the t-test.

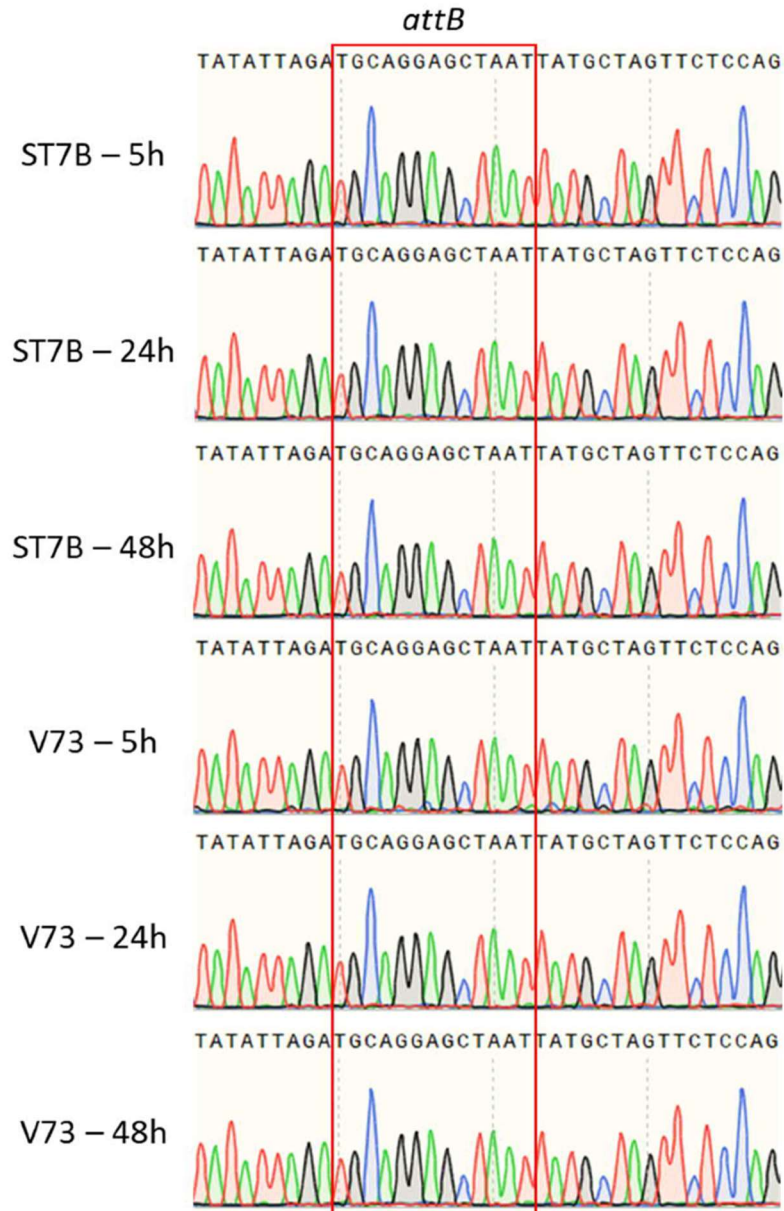

**Figure S5.** Sanger sequencing of the restored *yabG* gene in *C. botulinum* V73 at different time points. The *yabG* gene sequence of the ST7B counterpart was used as a control.

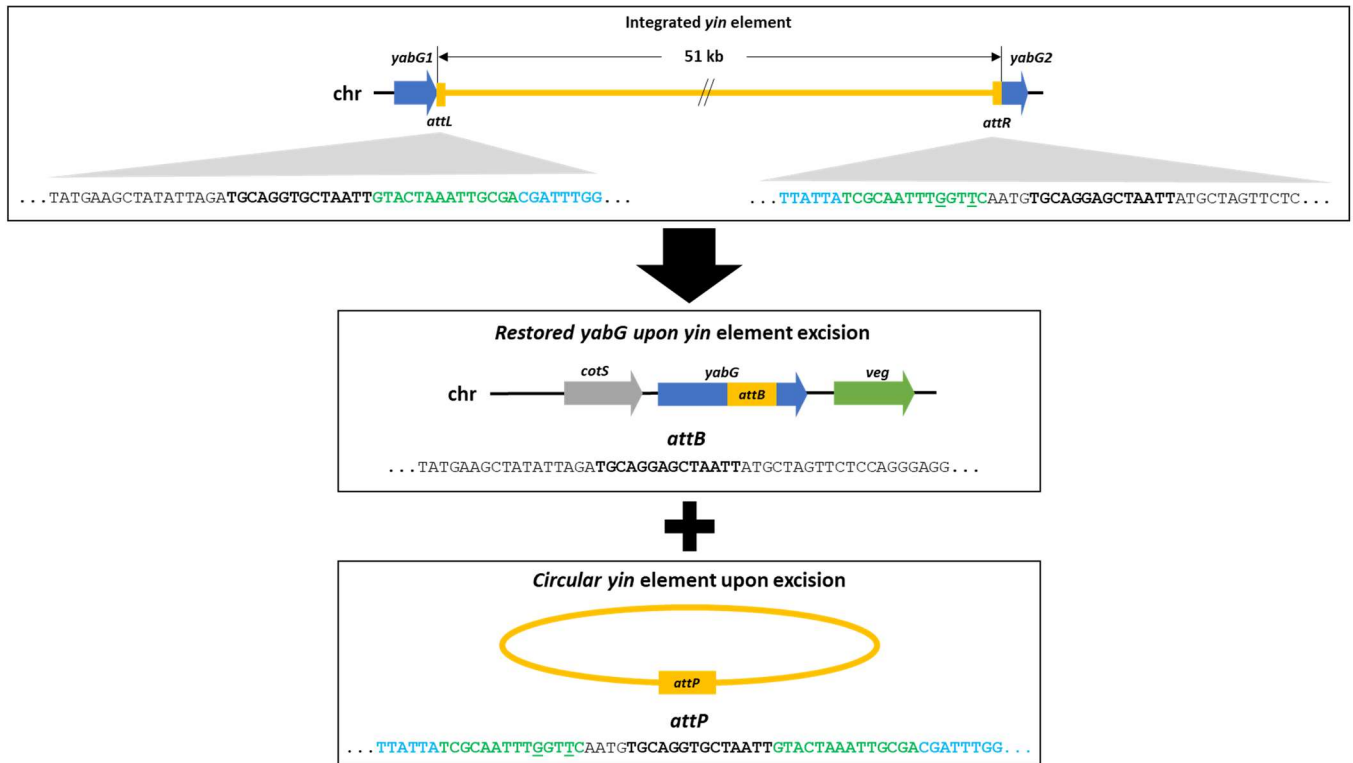

**Figure S6.** Identification of the attachment sites (*att*) based on the genome sequence of *C. botulinum* V73 and ST7B. The *attP* sequence was determined by Sanger sequencing (above). Legend: bold nucleotides, *attB* sites; blue and green nucleotides, asymmetric overlapping regions present in *attP*, *attL* and *attR*; underlined nucleotides, mismatched nucleotides.

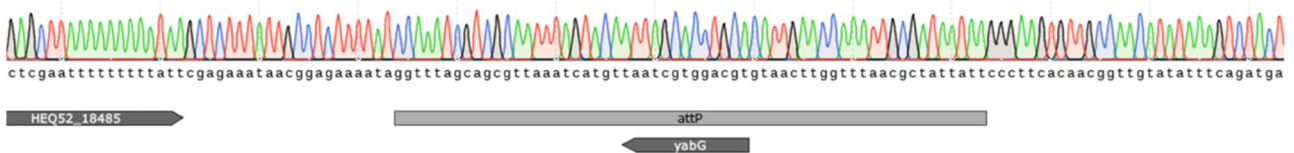

**Figure S7.** Sanger sequencing of the *attP* site present in the circular yin element in *C. botulinum* V73.

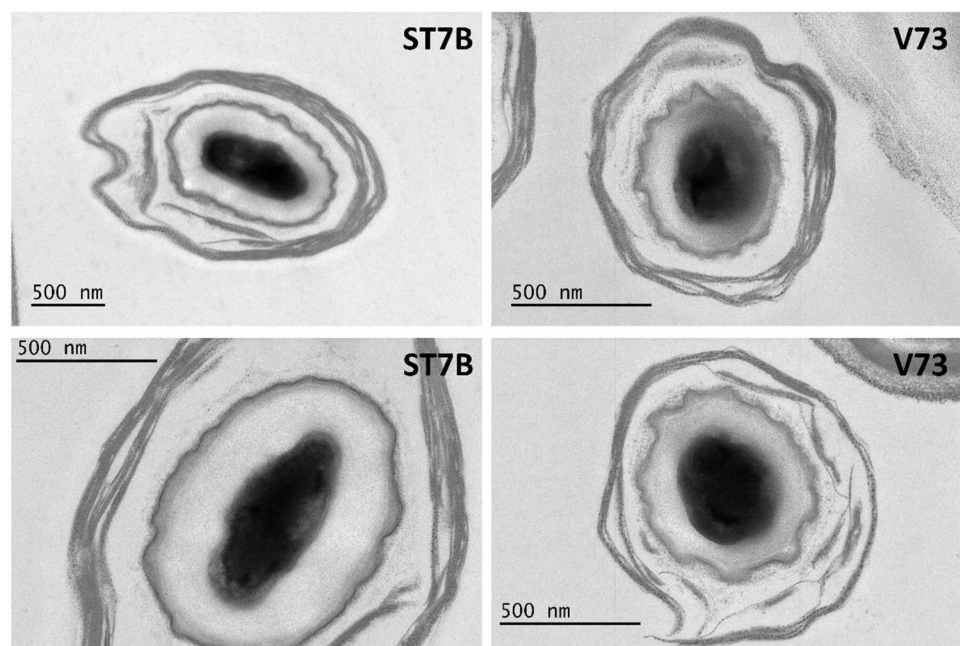

**Figure S8.** Transmission electron microscopy observations of individual *C. botulinum* ST7B and V73 spores.



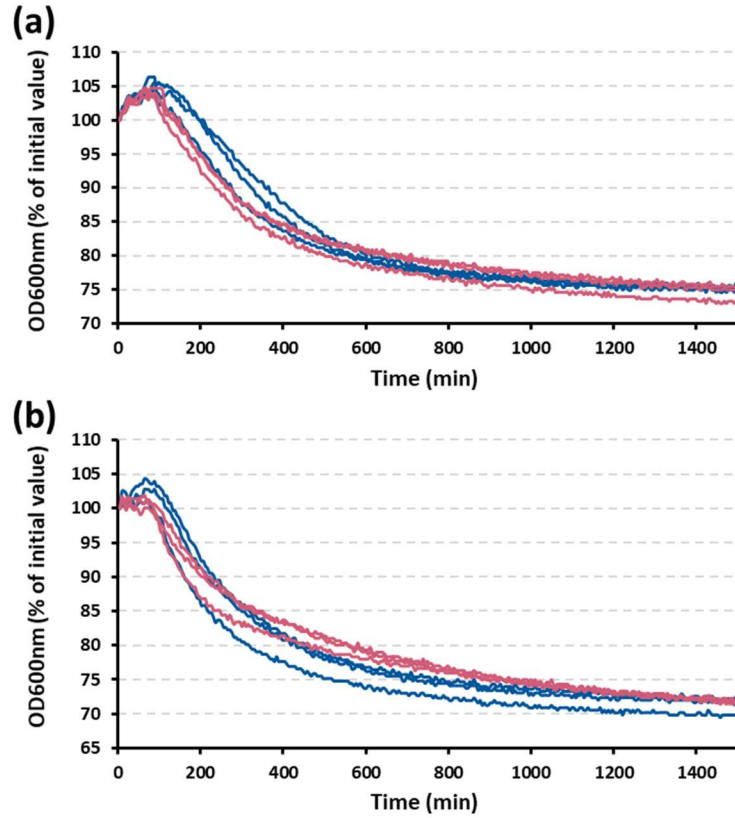

**Figure S9.** Spore germination assays of *C. botulinum* ST7B (blue) and V73 (pink). The germination buffer was either supplemented with L-alanine (a) or L-cysteine (b). For each condition tested, three technical replicates were measured.

**Table S1.** Primers used in the present study.

| Primer name   | Sequence (orientation 5'-3')     | Comments                                                           |
|---------------|----------------------------------|--------------------------------------------------------------------|
| yabG_rev      | GGGGGATAAGGGAAAGCACT             | Reverse primer located in <i>yabG</i>                              |
| yabG_for      | CCACCAATTCCCTTTATACCTG           | Forward primer paired with <i>yabG_rev</i>                         |
| yin_int_for   | TCTTAGGCAGCGAACCAATT             | Forward primer located in <i>yin</i> , paired with <i>yabG_rev</i> |
| circ_for      | GTGACAGACGCAGAATGGAA             | Forward primer located in <i>yin</i> , paired with <i>circ_rev</i> |
| circ_rev      | GGTGGCTTAAATGGCAAGAT             | Reverse primer located in <i>yin</i> , paired with <i>circ_for</i> |
| qPCR_yabG_for | GGCGCTTGTCATCTTGCTA              | Forward primer located in <i>yabG</i> (qPCR)                       |
| qPCR_yabG_rev | TTCACATAAAAATACTG-<br>GATCTAAACA | Reverse primer paired with qPCR_yabG_for                           |
| ctr_yabG_for  | ACCATGACTAAGAAGGAAGAGGT          | Forward primer located in <i>yabG</i>                              |
| ctr_yabG_rev  | TGAAGAATTTTACCTGGTCTCCC          | Reverse primer, paired with <i>ctr_yabG_for</i>                    |

**Table S2.** List of genomic features predicted in the *yin* element.

| Locus tag   | Coordinate    | Predicted gene product                     |
|-------------|---------------|--------------------------------------------|
| HEQ52_18055 | 159...500     | transcriptional regulator                  |
| HEQ52_18060 | 500...670     | hypothetical protein                       |
| HEQ52_18065 | 667...3051 c  | hypothetical protein                       |
| HEQ52_18070 | 3111...3413 c | hypothetical protein                       |
| HEQ52_18075 | 3426...3863 c | hypothetical protein                       |
| HEQ52_18080 | 4159...4323 c | hypothetical protein                       |
| HEQ52_18085 | 4444...4644 c | helix-turn-helix transcriptional regulator |
| HEQ52_18090 | 4692...5102 c | recombinase family protein                 |
| HEQ52_18095 | 5210...6109 c | SH3 domain-containing protein              |

|             |                 |                                                      |
|-------------|-----------------|------------------------------------------------------|
| HEQ52_18100 | 6251...6439 c   | hypothetical protein                                 |
| HEQ52_18105 | 6464...6742 c   | hypothetical protein                                 |
| HEQ52_18110 | 6795...7013 c   | helix-turn-helix transcriptional regulator           |
| HEQ52_18115 | 7224...7382 c   | XkdX family protein                                  |
| HEQ52_18120 | 7406...7573 c   | hypothetical protein                                 |
| HEQ52_18125 | 7577...9190 c   | hypothetical protein                                 |
| HEQ52_18130 | 9231 10289 c    | RNA-dependent DNA polymerase                         |
| HEQ52_18135 | 10548...10892 c | diversity-generating retroelement protein Avd        |
| HEQ52_18140 | 10977...11312 c | hypothetical protein                                 |
| HEQ52_18145 | 11319...11723 c | hypothetical protein                                 |
| HEQ52_18150 | 11726...12802c  | YmfQ family protein                                  |
| HEQ52_18155 | 12789...13862c  | baseplate J/gp47 family protein                      |
| HEQ52_18160 | 13855...14286c  | DUF2634 domain-containing protein                    |
| HEQ52_18165 | 14283...14534c  | hypothetical protein                                 |
| HEQ52_18170 | 14538...15530c  | terminase                                            |
| HEQ52_18175 | 15545...16162c  | LysM peptidoglycan-binding domain-containing protein |
| HEQ52_18180 | 16178...18577c  | hypothetical protein                                 |
| HEQ52_18185 | 18624...19187c  | hypothetical protein                                 |
| HEQ52_18190 | 19209...19376c  | hypothetical protein                                 |
| HEQ52_18195 | 19409...19834c  | XkdN-like protein                                    |
| HEQ52_18200 | 19887...20315c  | phage tail tube protein                              |
| HEQ52_18205 | 20333...21409c  | phage tail sheath protein                            |
| HEQ52_18210 | 21413...21853c  | hypothetical protein                                 |
| HEQ52_18215 | 21856...22275c  | HK97 gp10 family phage protein                       |
| HEQ52_18220 | 22276...22626c  | hypothetical protein                                 |
| HEQ52_18225 | 22628...22972c  | phage head-tail connector protein                    |
| HEQ52_18230 | 23011...24033c  | capsid protein                                       |
| HEQ52_18235 | 24048...24374c  | hypothetical protein                                 |
| HEQ52_18240 | 24387...24980c  | phage scaffold protein                               |
| HEQ52_18245 | 25000...25245c  | hypothetical protein                                 |
| HEQ52_18250 | 25443...25829c  | ABC transporter ATPase                               |
| HEQ52_18255 | 25880...26218c  | hypothetical protein                                 |
| HEQ52_18260 | 26231...27250c  | minor capsid proteinNT                               |
| HEQ52_18265 | 27243...28652c  | phage portal proteinQAV                              |
| HEQ52_18270 | 28665...29921c  | PBSX family phage terminase large subunit            |
| HEQ52_18275 | 29896...30804c  | phage portal protein                                 |
| HEQ52_18280 | 30835...31029c  | hypothetical protein                                 |
| HEQ52_18285 | 31117...31425c  | hypothetical protein                                 |
| HEQ52_18290 | 31507...32739c  | ParB N-terminal domain-containing protein            |
| HEQ52_18295 | 32741...32947c  | hypothetical protein                                 |
| HEQ52_18300 | 33095...33670c  | hypothetical protein                                 |
| HEQ52_18305 | 33701...33931c  | hypothetical protein                                 |
| HEQ52_18310 | 33931...34227c  | hypothetical protein                                 |
| HEQ52_18315 | 34298...35038c  | hypothetical protein                                 |
| HEQ52_18320 | 35087...35287c  | hypothetical protein                                 |
| HEQ52_18325 | 35322...35585c  | hypothetical protein                                 |
| HEQ52_18330 | 35628...35822c  | hypothetical protein                                 |
| HEQ52_18335 | 35864...36010c  | hypothetical protein                                 |
| HEQ52_18340 | 36054...36245c  | hypothetical protein                                 |
| HEQ52_18345 | 36232...36444c  | hypothetical protein                                 |
| HEQ52_18350 | 36463...36609c  | aspartyl-phosphate phosphatase Spo0E family protein  |
| HEQ52_18355 | 36646...36807c  | hypothetical protein                                 |

|             |                |                                            |
|-------------|----------------|--------------------------------------------|
| HEQ52_18360 | 36810...37262c | hypothetical protein                       |
| HEQ52_18365 | 37273...37479c | hypothetical protein                       |
| HEQ52_18370 | 37628...37792c | hypothetical protein                       |
| HEQ52_18375 | 37804...38109c | hypothetical protein                       |
| HEQ52_18380 | 38118...38444c | hypothetical protein                       |
| HEQ52_18385 | 38463...39218c | hypothetical protein                       |
| HEQ52_18390 | 39237...39470c | hypothetical protein                       |
| HEQ52_18395 | 39482...40003c | hypothetical protein                       |
| HEQ52_18400 | 40093...40575c | hypothetical protein                       |
| HEQ52_18405 | 40565...40933c | hypothetical protein                       |
| HEQ52_18410 | 40948...41508c | hypothetical protein                       |
| HEQ52_18415 | 41546...41707c | hypothetical protein                       |
| HEQ52_18420 | 41709...42053c | hypothetical protein                       |
| HEQ52_18425 | 42064...42885c | ATP-binding protein                        |
| HEQ52_18430 | 42857...43636c | DnaD domain protein                        |
| HEQ52_18435 | 43648...43929c | hypothetical protein                       |
| HEQ52_18440 | 44112...44309c | hypothetical protein                       |
| HEQ52_18445 | 44330...45196c | hypothetical protein                       |
| HEQ52_18450 | 45208...46230c | hypothetical protein                       |
| HEQ52_18455 | 46468...46695c | hypothetical protein                       |
| HEQ52_18460 | 46709...46870c | hypothetical protein                       |
| HEQ52_18465 | 46923...47084c | hypothetical protein                       |
| HEQ52_18470 | 47170...47352c | XRE family transcriptional regulator       |
| HEQ52_18475 | 47594...48046  | helix-turn-helix transcriptional regulator |
| HEQ52_18480 | 48082...48510  | ImmA/IrrE family metallo-endopeptidase     |
| HEQ52_18485 | 48746...50401  | recombinase family protein                 |

---

**Table S3.** Raw microscopy cell counts.

| Time in hours | Strain | Replicate | Picture | Vegetative cells | Stage IV–V sporulating cells | Stage VI sporulating cells | Free phase bright spores | Free phase dark spores | Total |
|---------------|--------|-----------|---------|------------------|------------------------------|----------------------------|--------------------------|------------------------|-------|
| 5 h           | ST7B   | 1         | 1       | 253              | 0                            | 0                          | 0                        | 0                      | 253   |
|               |        | 1         | 2       | 287              | 0                            | 0                          | 0                        | 0                      | 287   |
|               |        | 2         | 1       | 517              | 0                            | 0                          | 0                        | 1                      | 518   |
|               |        | 3         | 1       | 718              | 0                            | 0                          | 0                        | 0                      | 718   |
| 5 h           | V73    | 1         | 1       | 568              | 0                            | 0                          | 0                        | 0                      | 568   |
|               |        | 2         | 1       | 428              | 0                            | 0                          | 0                        | 0                      | 428   |
|               |        | 3         | 2       | 319              | 0                            | 0                          | 0                        | 0                      | 319   |
| 24 h          | ST7B   | 1         | 1       | 1192             | 0                            | 0                          | 0                        | 0                      | 1192  |
|               |        | 2         | 1       | 673              | 0                            | 0                          | 0                        | 0                      | 673   |
|               |        | 3         | 1       | 791              | 0                            | 0                          | 0                        | 0                      | 791   |
| 24 h          | V73    | 1         | 1       | 530              | 296                          | 29                         | 1                        | 0                      | 856   |
|               |        | 2         | 1       | 776              | 256                          | 20                         | 0                        | 0                      | 1052  |
|               |        | 3         | 2       | 388              | 108                          | 24                         | 0                        | 0                      | 520   |
| 48 h          | ST7B   | 1         | 2       | 224              | 1                            | 4                          | 0                        | 0                      | 229   |
|               |        | 1         | 3       | 339              | 1                            | 3                          | 0                        | 0                      | 343   |
|               |        | 2         | 2       | 430              | 2                            | 2                          | 0                        | 0                      | 434   |
|               |        | 3         | 1       | 418              | 7                            | 4                          | 0                        | 1                      | 430   |
| 48 h          | V73    | 1         | 1       | 117              | 8                            | 163                        | 1                        | 0                      | 289   |
|               |        | 1         | 2       | 101              | 1                            | 172                        | 1                        | 0                      | 275   |
|               |        | 2         | 1       | 92               | 5                            | 202                        | 0                        | 0                      | 299   |
|               |        | 3         | 1       | 198              | 13                           | 367                        | 3                        | 0                      | 581   |
| 72 h          | ST7B   | 1         | 4       | 281              | 2                            | 16                         | 0                        | 0                      | 299   |
|               |        | 2         | 1       | 86               | 5                            | 5                          | 0                        | 0                      | 96    |
|               |        | 2         | 2       | 156              | 1                            | 4                          | 0                        | 0                      | 161   |
|               |        | 2         | 3       | 80               | 1                            | 4                          | 0                        | 0                      | 85    |
|               |        | 3         | 1       | 76               | 0                            | 6                          | 0                        | 0                      | 82    |
|               |        | 3         | 2       | 124              | 1                            | 4                          | 0                        | 0                      | 129   |
|               |        | 3         | 3       | 123              | 1                            | 4                          | 0                        | 0                      | 128   |
| 72 h          | V73    | 1         | 2       | 55               | 0                            | 67                         | 8                        | 0                      | 130   |
|               |        | 1         | 3       | 42               | 2                            | 51                         | 9                        | 0                      | 104   |



|       |      |   |   |     |   |    |    |   |     |
|-------|------|---|---|-----|---|----|----|---|-----|
|       |      | 1 | 4 | 34  | 3 | 46 | 5  | 0 | 88  |
|       |      | 2 | 2 | 26  | 0 | 77 | 8  | 0 | 111 |
|       |      | 2 | 3 | 22  | 0 | 45 | 1  | 0 | 68  |
|       |      | 2 | 4 | 23  | 0 | 53 | 3  | 0 | 79  |
|       |      | 2 | 5 | 27  | 0 | 51 | 1  | 0 | 79  |
|       |      | 3 | 1 | 15  | 4 | 56 | 5  | 0 | 80  |
|       |      | 3 | 2 | 31  | 1 | 53 | 4  | 0 | 89  |
|       |      | 3 | 3 | 26  | 0 | 54 | 4  | 0 | 84  |
|       |      | 3 | 4 | 21  | 0 | 41 | 5  | 0 | 67  |
| 96 h  | ST7B | 1 | 1 | 92  | 1 | 2  | 0  | 0 | 95  |
|       |      | 1 | 2 | 58  | 0 | 4  | 0  | 0 | 62  |
|       |      | 1 | 3 | 57  | 0 | 2  | 0  | 0 | 59  |
|       |      | 1 | 4 | 108 | 0 | 3  | 0  | 0 | 111 |
|       |      | 2 | 1 | 81  | 0 | 4  | 1  | 2 | 88  |
|       |      | 2 | 2 | 89  | 0 | 0  | 2  | 1 | 92  |
|       |      | 2 | 3 | 120 | 0 | 1  | 0  | 0 | 121 |
|       |      | 3 | 1 | 145 | 1 | 2  | 0  | 0 | 148 |
|       |      | 3 | 2 | 120 | 0 | 5  | 0  | 0 | 125 |
| 96 h  | V73  | 3 | 3 | 111 | 1 | 7  | 0  | 0 | 119 |
|       |      | 1 | 2 | 18  | 1 | 49 | 63 | 0 | 131 |
|       |      | 1 | 3 | 31  | 0 | 77 | 50 | 0 | 158 |
|       |      | 1 | 4 | 29  | 0 | 52 | 15 | 0 | 96  |
|       |      | 2 | 1 | 58  | 1 | 92 | 12 | 0 | 163 |
|       |      | 2 | 2 | 40  | 0 | 92 | 21 | 0 | 153 |
|       |      | 3 | 1 | 34  | 0 | 57 | 21 | 0 | 112 |
|       |      | 3 | 2 | 83  | 0 | 0  | 13 | 1 | 97  |
|       |      | 3 | 3 | 31  | 1 | 36 | 12 | 0 | 80  |
| 120 h | ST7B | 3 | 4 | 24  | 1 | 35 | 10 | 0 | 70  |
|       |      | 1 | 1 | 94  | 0 | 10 | 0  | 0 | 104 |
|       |      | 1 | 2 | 106 | 2 | 1  | 0  | 0 | 109 |
|       |      | 1 | 3 | 100 | 2 | 17 | 0  | 0 | 119 |
|       |      | 2 | 1 | 44  | 2 | 9  | 0  | 0 | 55  |
|       |      | 2 | 2 | 47  | 0 | 6  | 0  | 0 | 53  |
|       |      | 2 | 3 | 45  | 1 | 2  | 1  | 0 | 49  |

|       |      |   |   |     |   |     |     |   |     |
|-------|------|---|---|-----|---|-----|-----|---|-----|
| 120 h | V73  | 2 | 4 | 102 | 1 | 14  | 0   | 0 | 117 |
|       |      | 2 | 5 | 175 | 6 | 28  | 0   | 0 | 209 |
|       |      | 3 | 1 | 122 | 0 | 9   | 0   | 0 | 131 |
|       |      | 3 | 2 | 115 | 0 | 15  | 0   | 1 | 131 |
|       |      | 3 | 3 | 110 | 3 | 11  | 0   | 0 | 124 |
|       |      | 1 | 1 | 43  | 0 | 80  | 48  | 0 | 171 |
|       |      | 1 | 2 | 61  | 0 | 74  | 30  | 0 | 165 |
|       |      | 2 | 1 | 54  | 0 | 108 | 41  | 0 | 203 |
|       |      | 2 | 2 | 41  | 4 | 61  | 32  | 0 | 138 |
|       |      | 3 | 1 | 31  | 1 | 54  | 38  | 0 | 124 |
|       |      | 3 | 2 | 43  | 2 | 94  | 43  | 0 | 182 |
| 240 h | ST7B | 1 | 1 | 103 | 5 | 36  | 16  | 5 | 165 |
|       |      | 1 | 2 | 92  | 1 | 20  | 21  | 0 | 134 |
|       |      | 2 | 1 | 94  | 0 | 8   | 9   | 0 | 111 |
|       |      | 2 | 2 | 45  | 1 | 14  | 4   | 0 | 64  |
|       |      | 2 | 3 | 83  | 1 | 17  | 11  | 0 | 112 |
|       |      | 2 | 4 | 80  | 0 | 9   | 11  | 1 | 101 |
|       |      | 3 | 1 | 87  | 2 | 24  | 9   | 0 | 122 |
|       |      | 3 | 2 | 58  | 0 | 22  | 12  | 0 | 92  |
|       |      | 3 | 5 | 67  | 2 | 15  | 12  | 1 | 97  |
| 240 h | V73  | 1 | 1 | 59  | 0 | 19  | 196 | 0 | 274 |
|       |      | 1 | 2 | 54  | 1 | 9   | 258 | 0 | 322 |
|       |      | 2 | 1 | 99  | 1 | 29  | 515 | 0 | 644 |
|       |      | 3 | 1 | 94  | 1 | 26  | 410 | 4 | 535 |
